# Supplementary material
Source: PubMed Central journal article supplement (PMC1236681)
Supplement: JCI0525256sd.pdf [file JCI0525256sd.pdf]

## Supplemental figure 1.

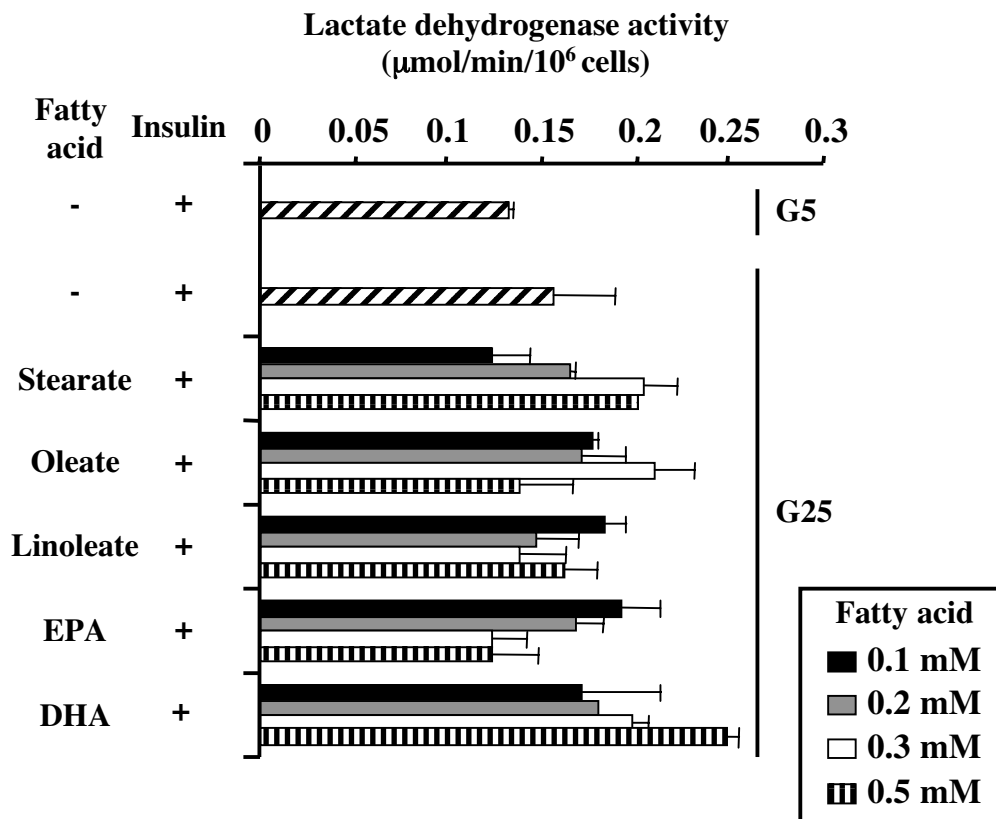

**Supplemental figure 1. Culture-medium lactate dehydrogenase activity in hepatocytes cultured in the presence of various fatty acids.** After plating hepatocytes were cultured for 24h in the presence of 5 mM glucose. Hepatocytes were then incubated for 24h in the presence of 5 or 25 mM glucose with 100 nM insulin and 100 nM dexamethasone in the presence of various concentrations of albumin-bound stearate (C18), oleate (C18:1(n-9)), linoleate (C18:2 (n-6)), EPA (C20:5 (n-3)) or DHA (C22:6 (n-3)). Lactate dehydrogenase activity was determined in the culture medium after fatty acid treatment. Results are mean  $\pm$  S.E. from values obtained from 3 independent cultures. No significant effect of PUFA (*i.e.* linoleate, EPA or DHA) on LDH leakage was observed whatever the fatty acid concentrations tested.

## Supplemental figure 2.

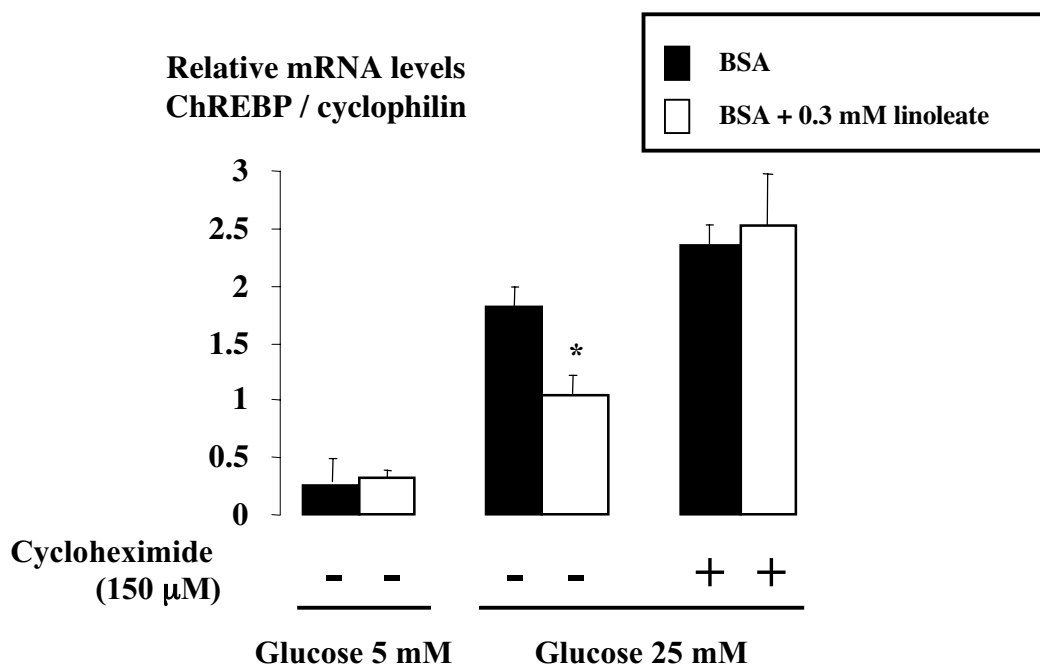

**Supplemental figure 2. Protein synthesis is required for the decay of ChREBP mRNA .** After plating, hepatocytes were cultured for 48h in the presence of 25 mM glucose and 100 nM insulin. Hepatocytes were then treated with cycloheximide (30 μM) for 2h prior to the addition of albumin-bound linoleate (C18:2 (n-6)) or albumin alone. ChREBP mRNA abundance was determined by RT-PCR 6 h after the addition of linoleate. Results are the mean ± S.E. from values obtained from 3 independent cultures. (\*) indicates that linoleate significantly reduced ChREBP mRNA compared to hepatocytes cultured in the presence of 25mM glucose and 100nM insulin (p < 0.05).

**Supplemental figure 3.**

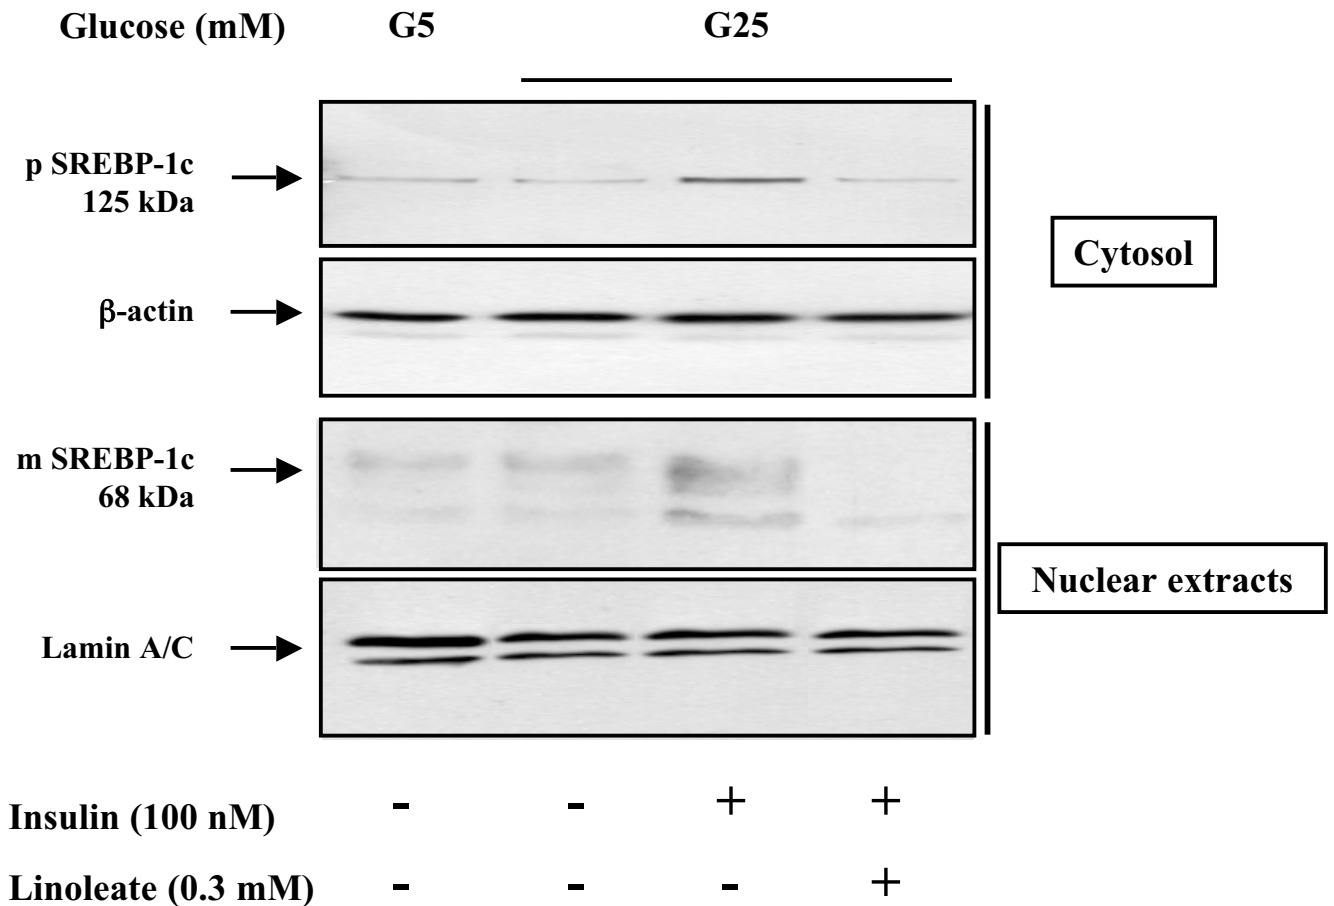

**Supplemental figure 3. PUFA suppress precursor and mature SREBP-1 protein in cultured hepatocytes.** After plating, hepatocytes were cultured for 24h in the presence of 5 mM glucose. Hepatocytes were then incubated for 24h in the presence of 5 or 25 mM glucose with or without 100 nM insulin and 100 nM dexamethasone containing or not 0.3 mM of albumin-bound linoleate. Precursor (p SREBP-1, 125 kDa) and mature (m SREBP-1, 68 kDa) forms of SREBP-1 protein, were measured. A representative Western blot of 4 independent cultures is shown.
